# Supplementary material for: MSC-derived Extracellular Vesicles Attenuate Immune Responses in Two Autoimmune Murine Models: Type 1 Diabetes and Uveoretinitis
Source: PubMed Central journal article supplement — Stem Cell Reports. 2017 May 9;8(5):1214–25. doi: 10.1016/j.stemcr.2017.04.008 (PMC5425726; doi:10.1016/j.stemcr.2017.04.008), 2017-05-09
Supplement: mmc1.pdf [file mmc1.pdf]

**Stem Cell Reports, Volume 8**

**Supplemental Information**

**MSC-derived Extracellular Vesicles Attenuate Immune Responses in  
Two Autoimmune Murine Models: Type 1 Diabetes and Uveoretinitis**

**Taeko Shigemoto-Kuroda, Joo Youn Oh, Dong-ki Kim, Hyun Jeong Jeong, Se Yeon Park, Hyun Ju Lee, Jong Woo Park, Tae Wan Kim, Su Yeon An, Darwin J. Prockop, and Ryang Hwa Lee**

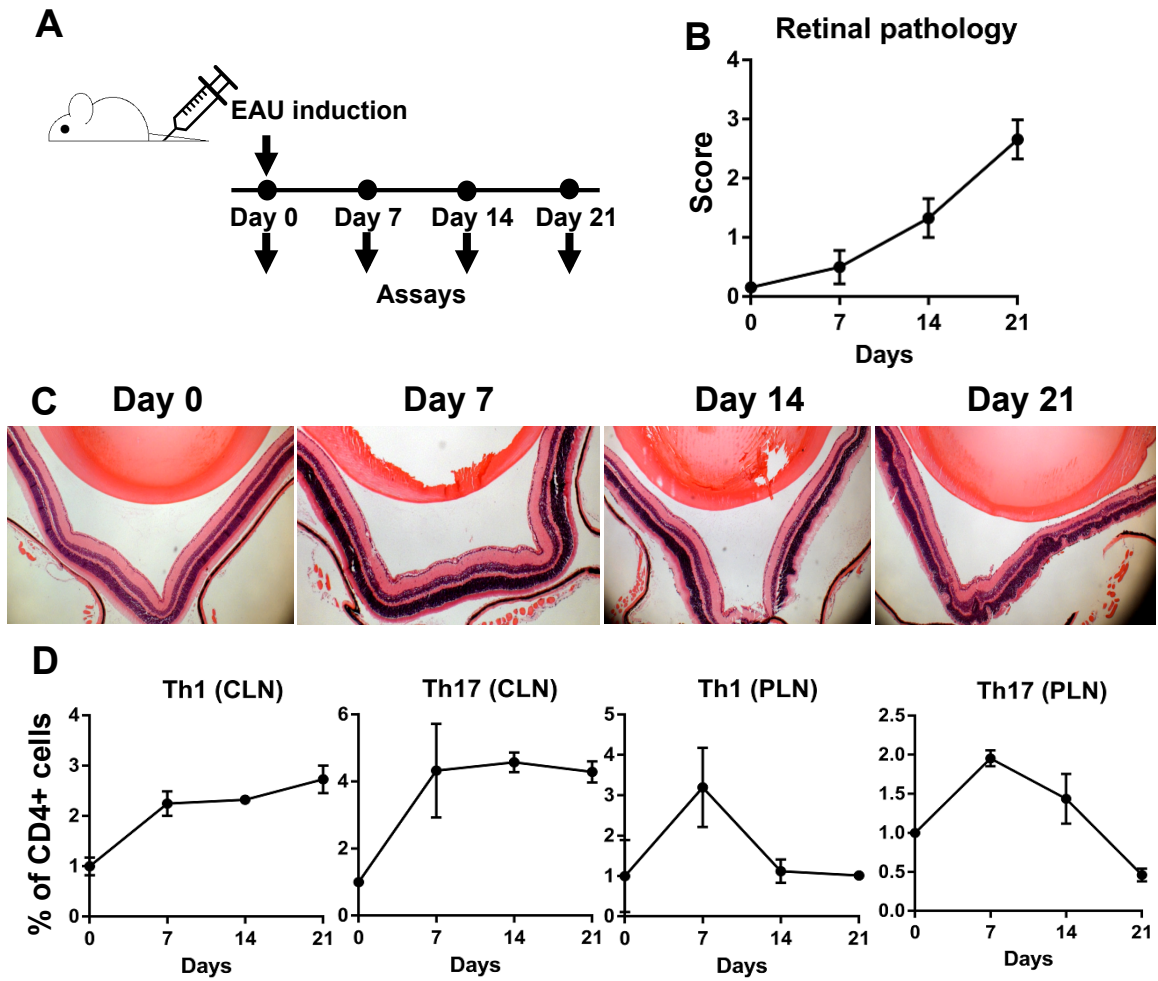

**Figure S1. Time course of retinal pathology and the percentages of Th1 and Th17 cells in lymph nodes. (Related to Figure 3)**

**A.** Experimental scheme. On day 0, EAU was induced, and on days 7, 14, and 21, the eyes and lymph nodes were evaluated ( $n=5$  mice per each time point). Retinal pathology scoring (**B**) and representative pictures (**C**) of the retina with time after EAU immunization. **D.** Cytometric analysis of cervical (CLN) and popliteal lymph nodes (PLN) with time after EAU immunization.

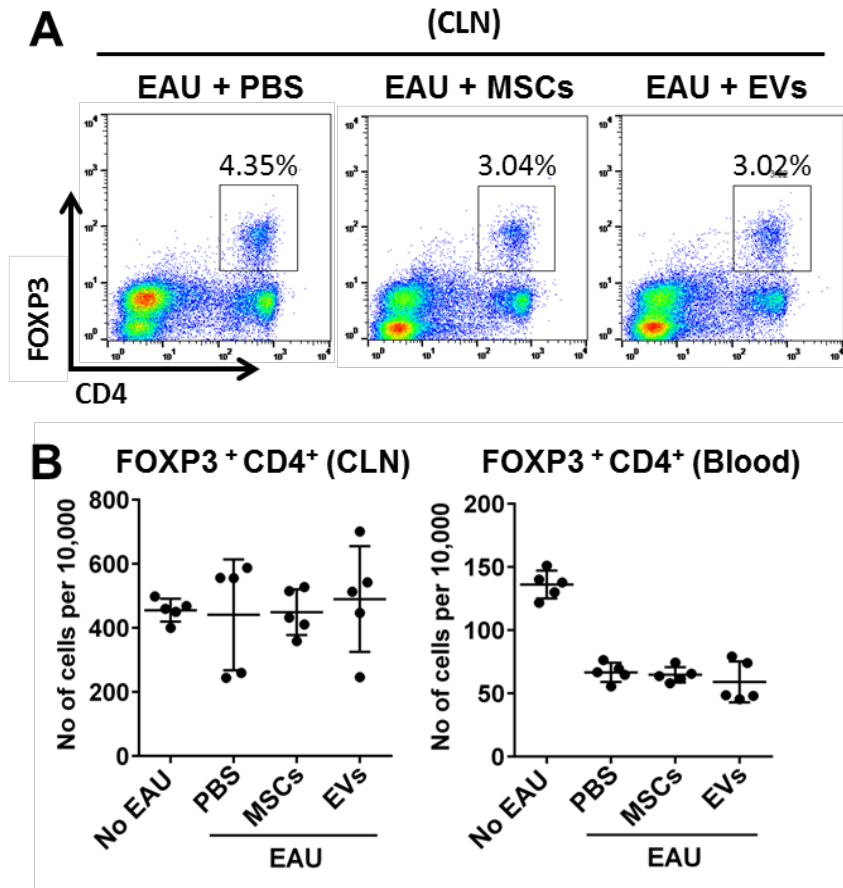

**Figure S2. Treg analysis in cervical lymph nodes and blood of mice treated with MSCs or EVs. (Related to Figure 4)**

Representative flow cytometry plots (**A**) and quantitative results (**B**) for FOXP3<sup>+</sup>CD4<sup>+</sup> Tregs in cervical lymph nodes (CLNs) and peripheral blood collected from EAU mice treated with PBS, MSCs, or EVs. For controls, normal mice without EAU induction were used. Dot indicates a single animal (n=5 per each group).
